# Supplementary material
Source: PubMed Central journal article supplement (PMC2573921)

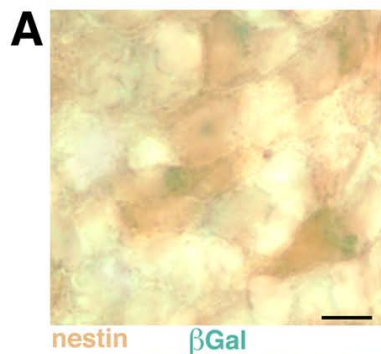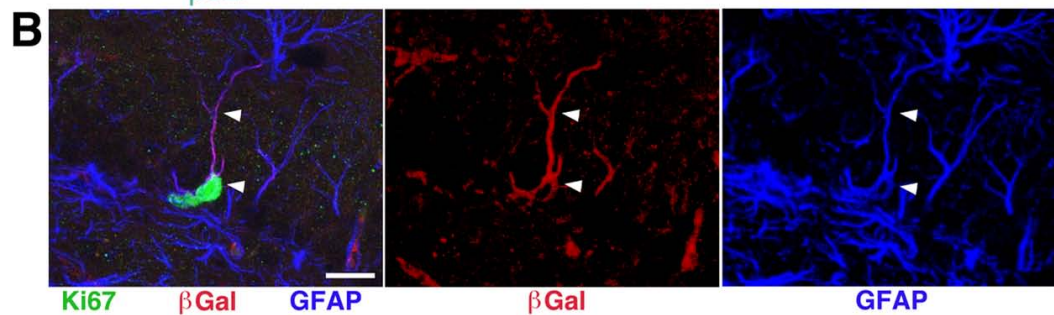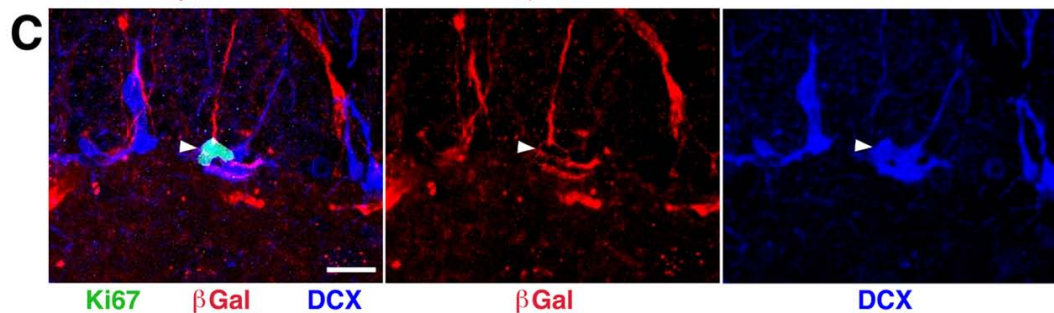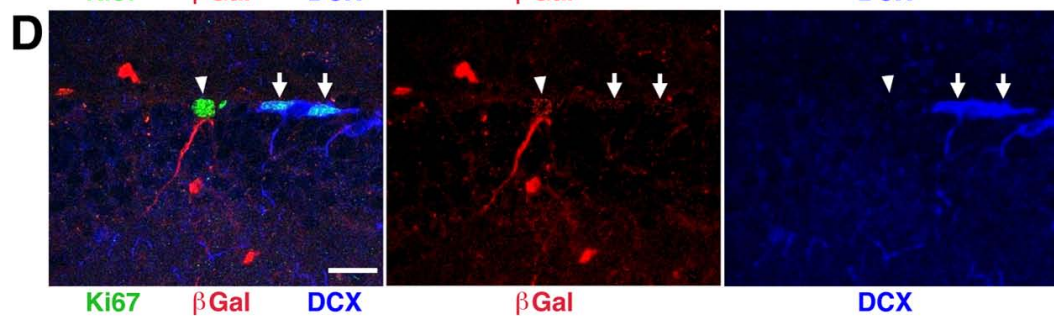

Figure S1

Supplement: pbio.0060246.sg001.pdf [file pbio.0060246.sg001.pdf]

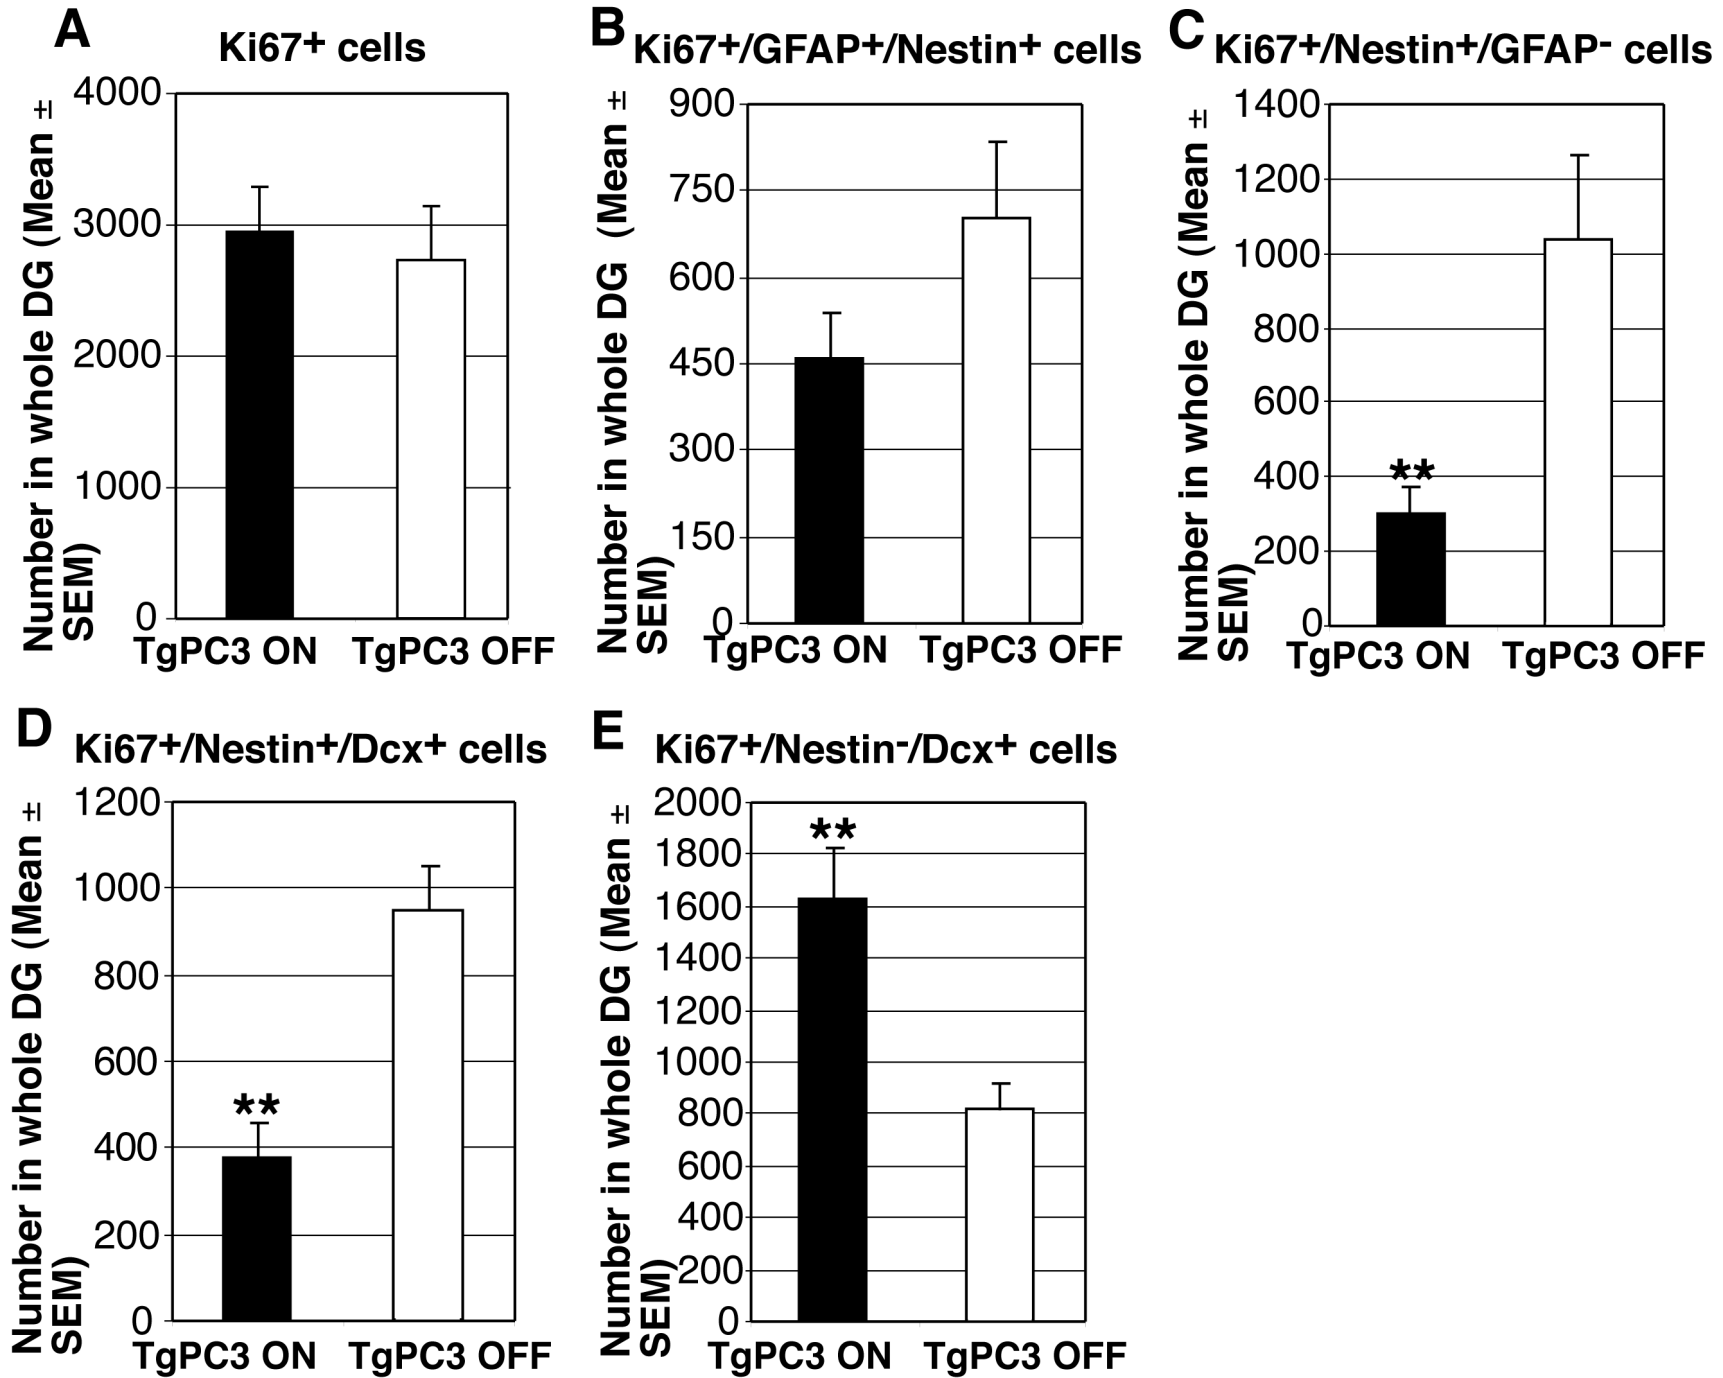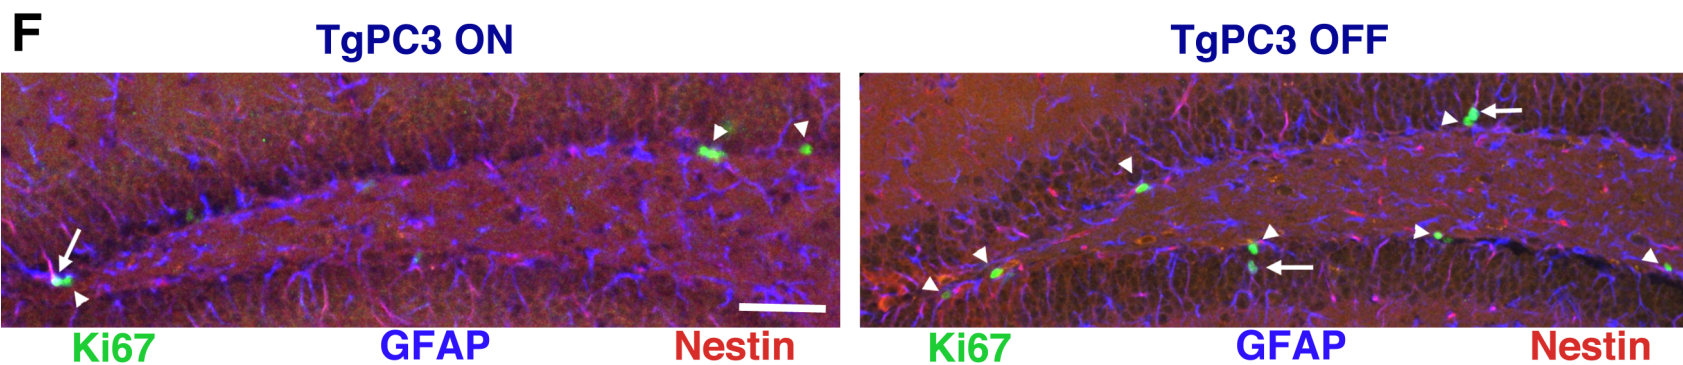

Supplement: pbio.0060246.sg002.pdf [file pbio.0060246.sg002.pdf]

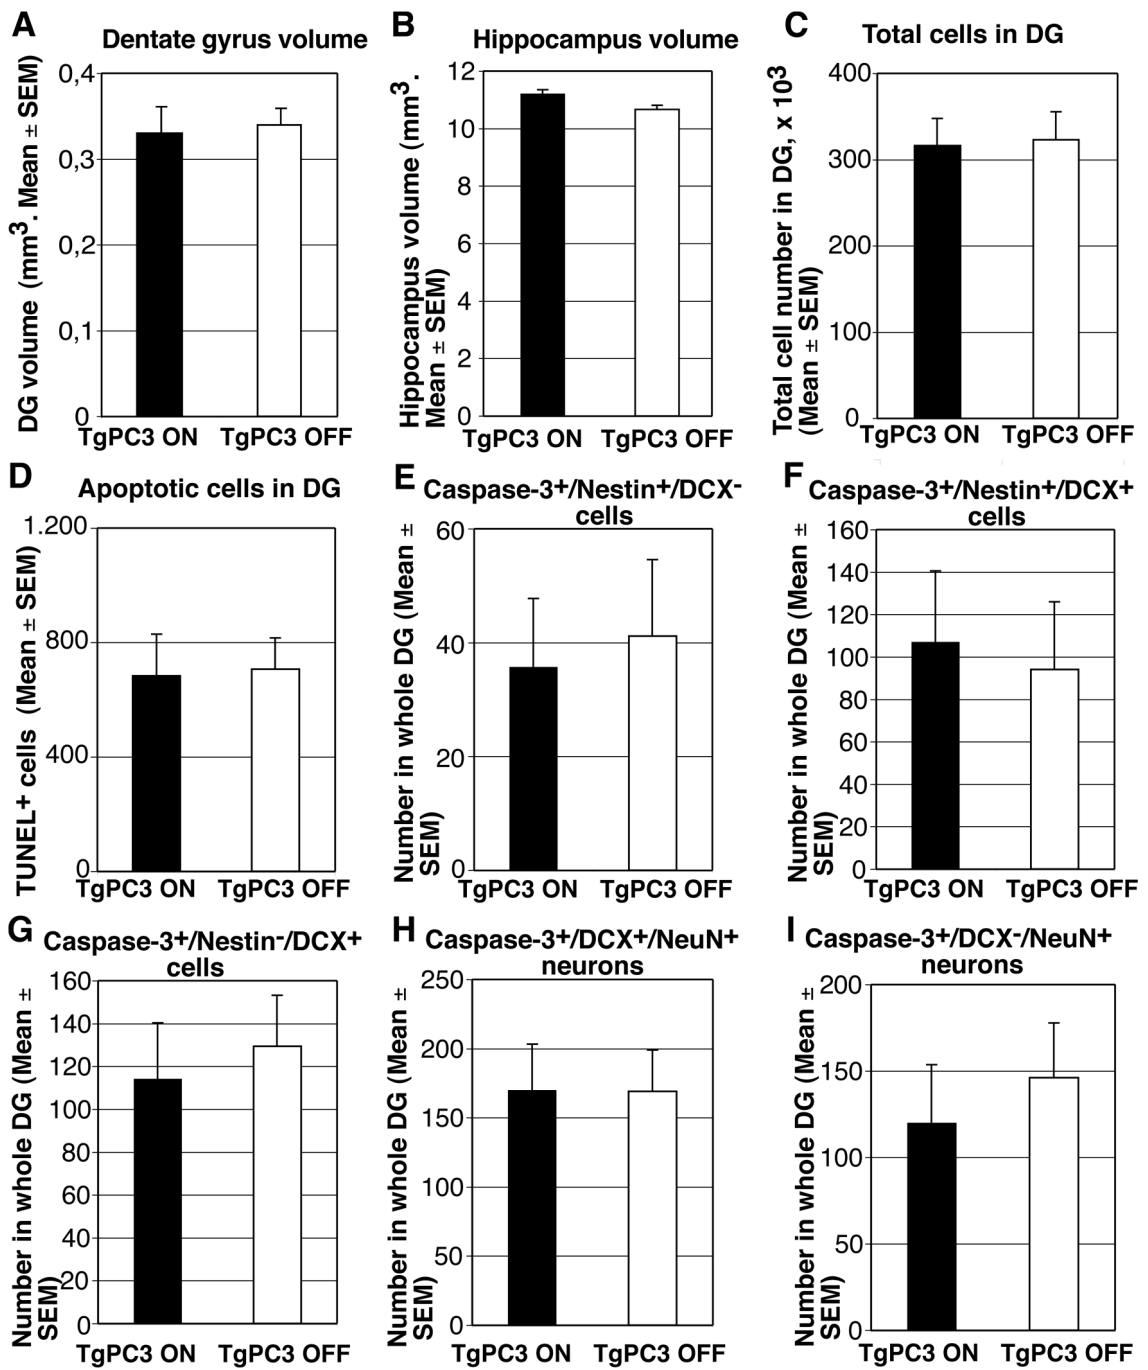

**J TgPC3 ON**

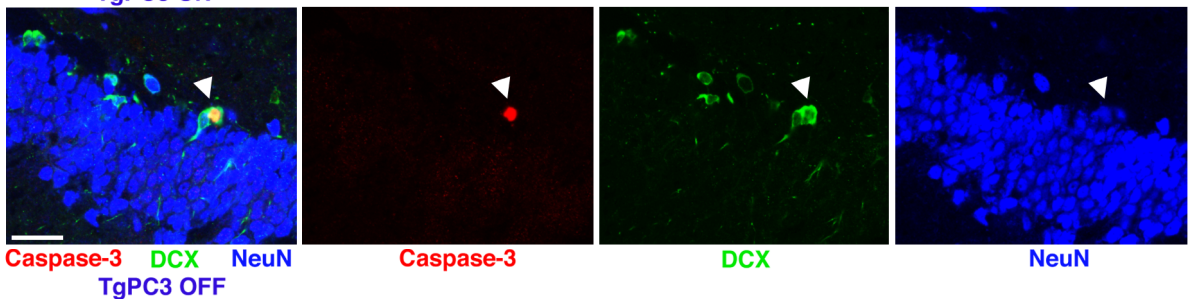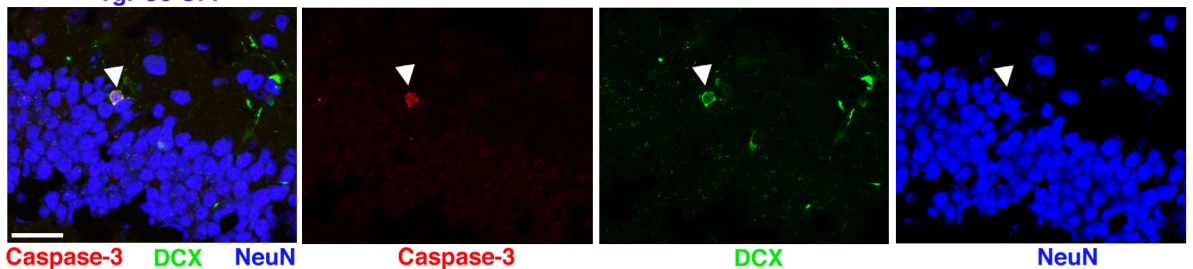

Supplement: pbio.0060246.sg003.pdf [file pbio.0060246.sg003.pdf]

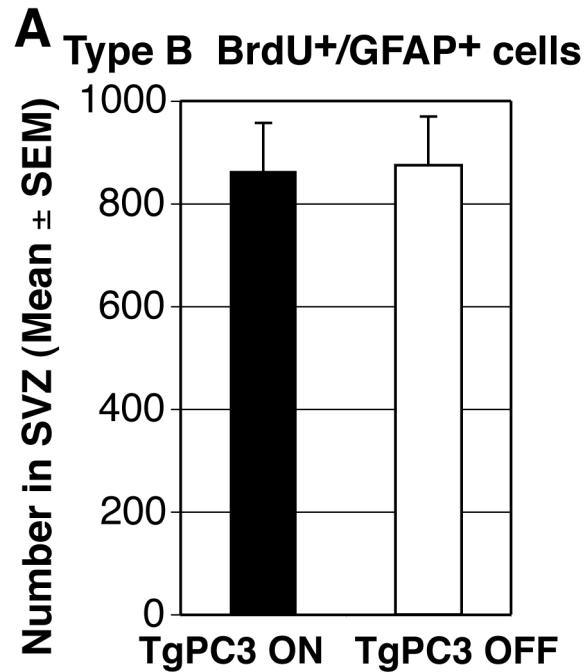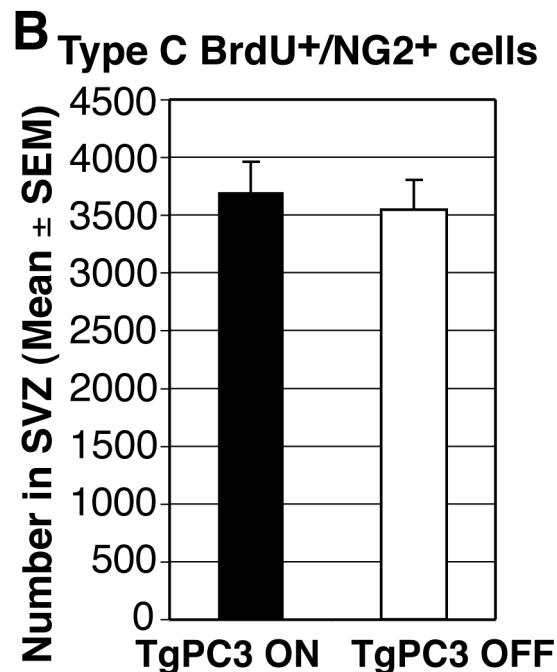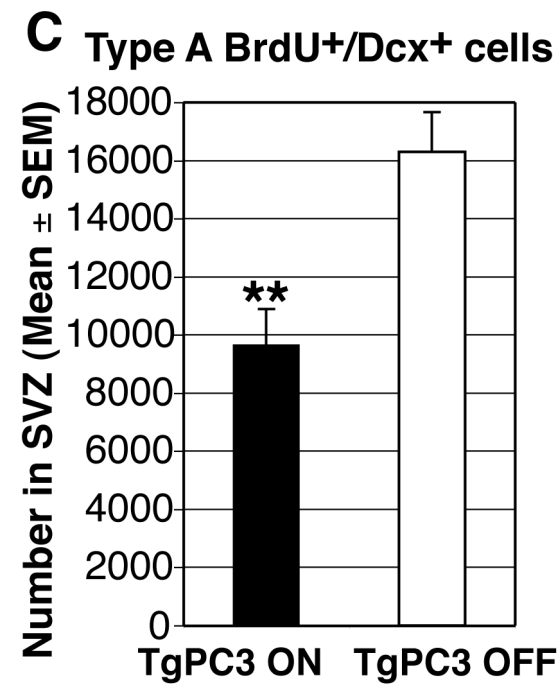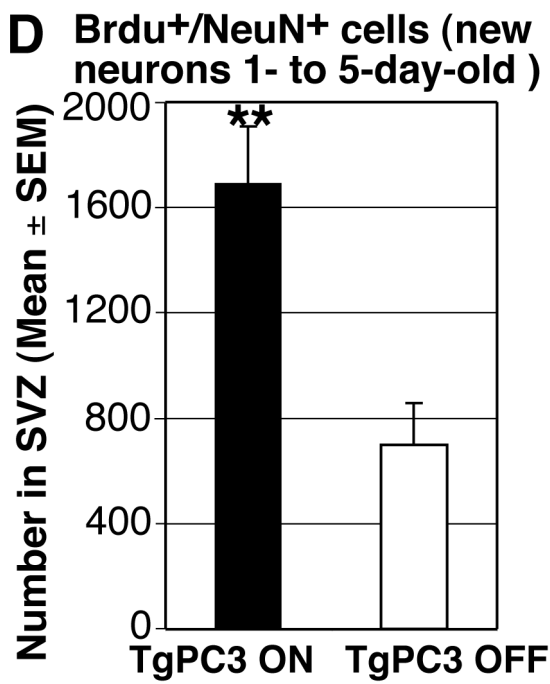

Supplement: pbio.0060246.sg004.pdf [file pbio.0060246.sg004.pdf]

**A**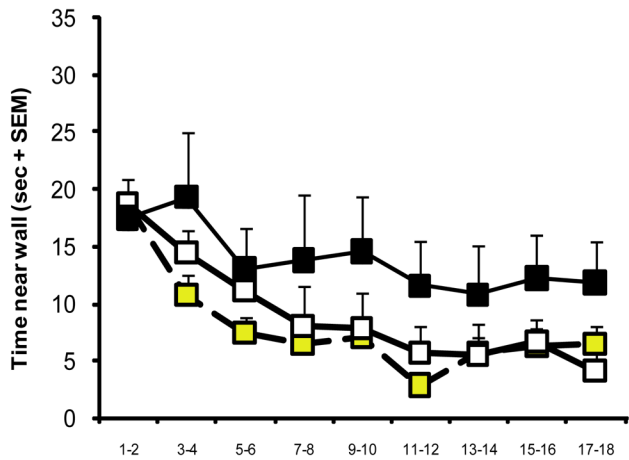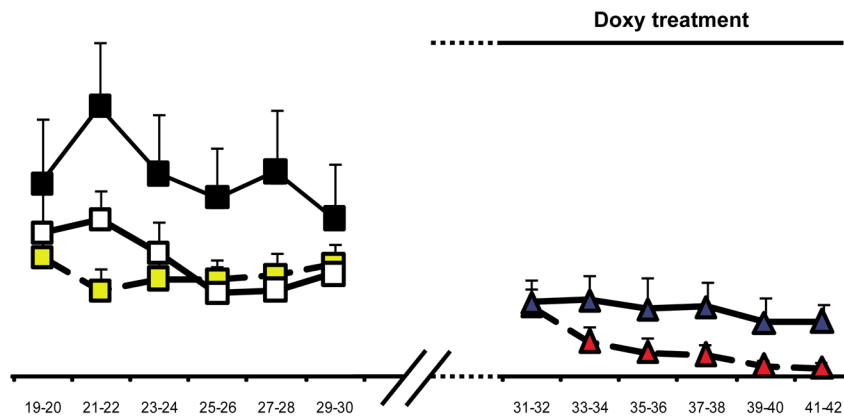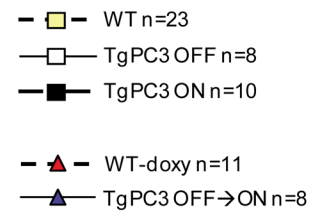**B**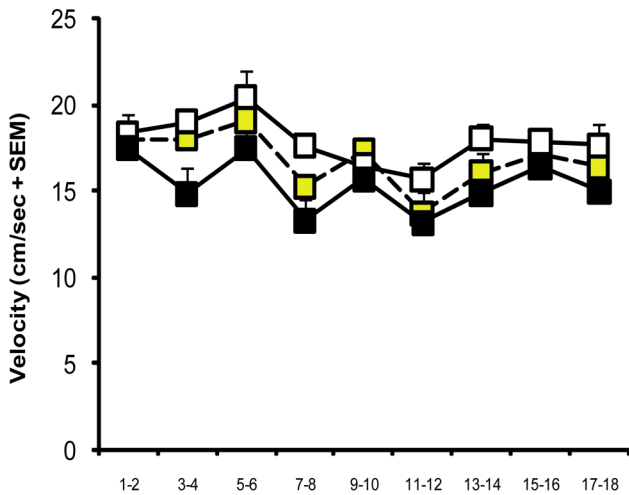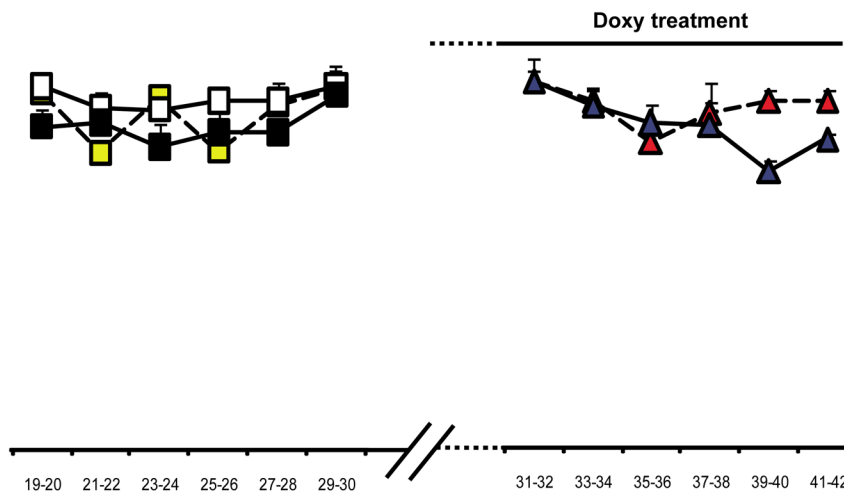

Supplement: pbio.0060246.sg005.pdf [file pbio.0060246.sg005.pdf]

**A**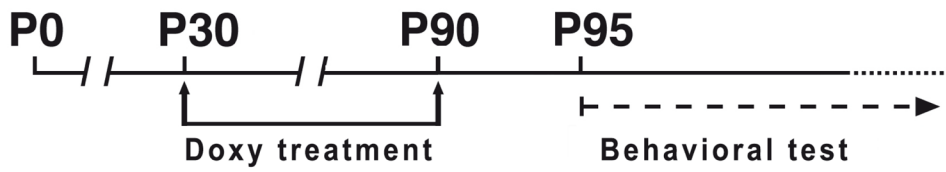**B****Morris water maze**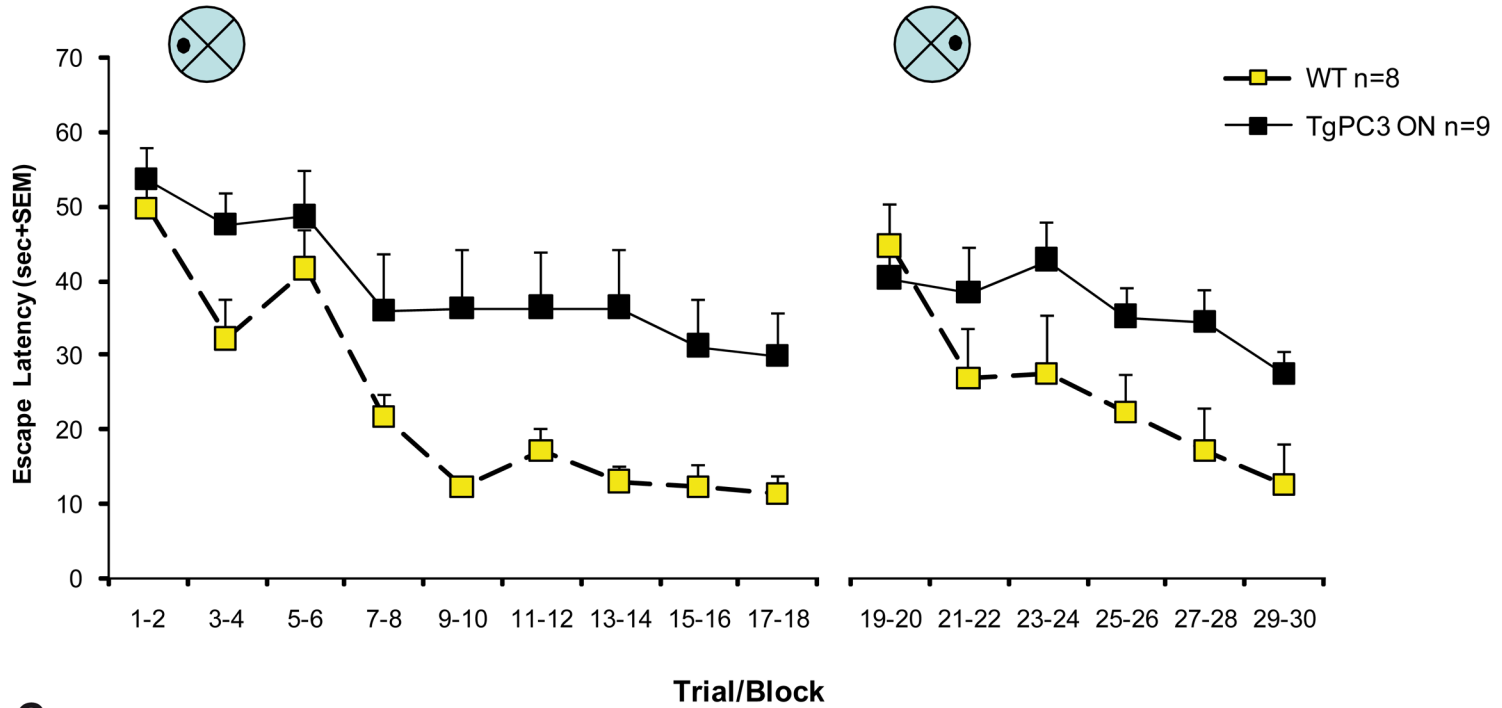**C**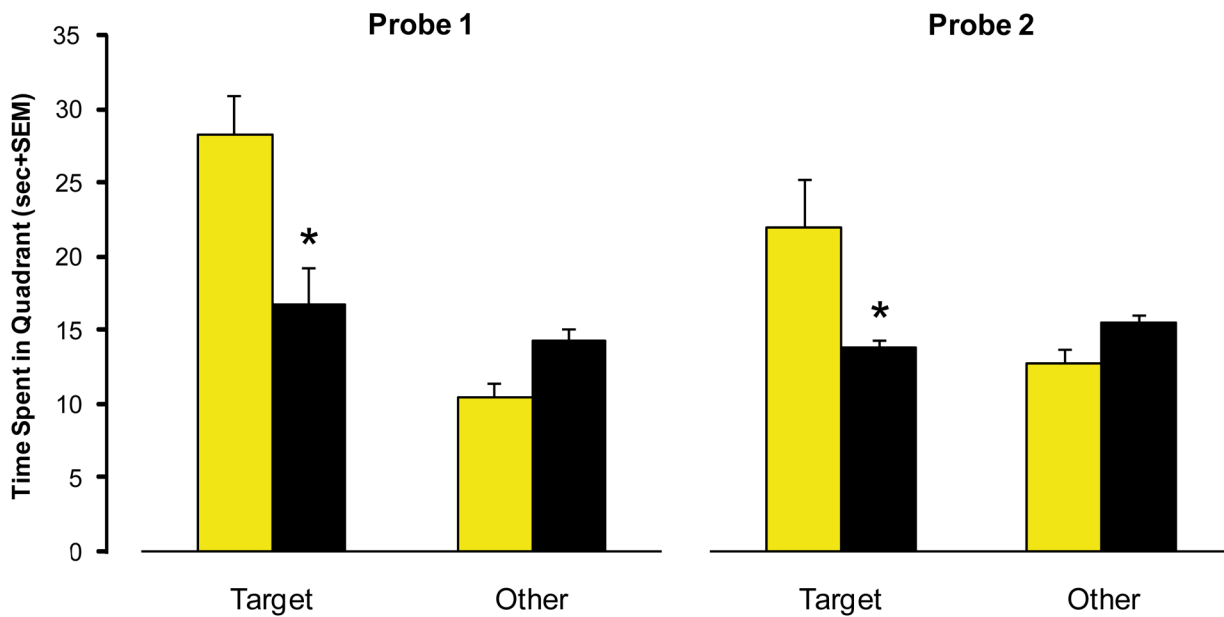

Supplement: pbio.0060246.sg006.pdf [file pbio.0060246.sg006.pdf]

## A Morris water maze - 4 weeks

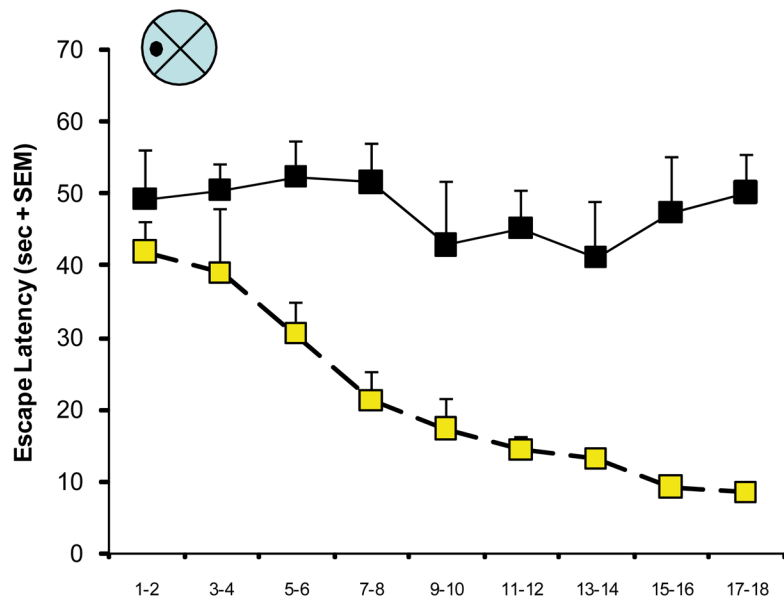

## Probe

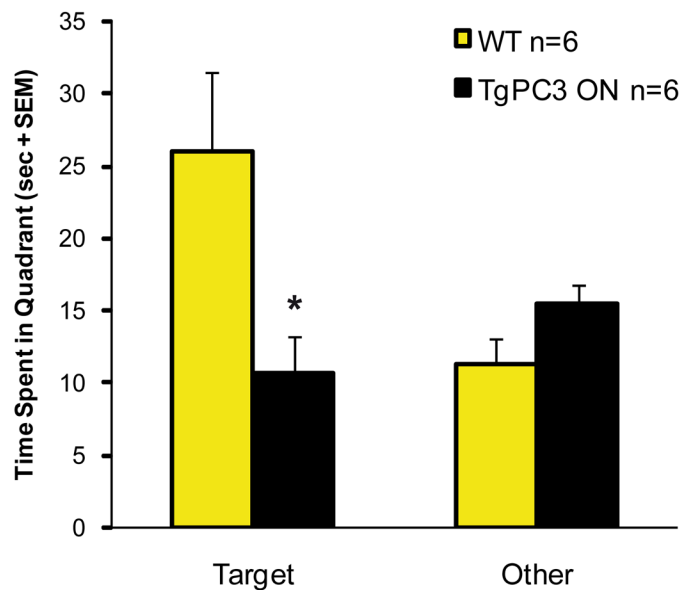

## B Morris water maze - 6 weeks

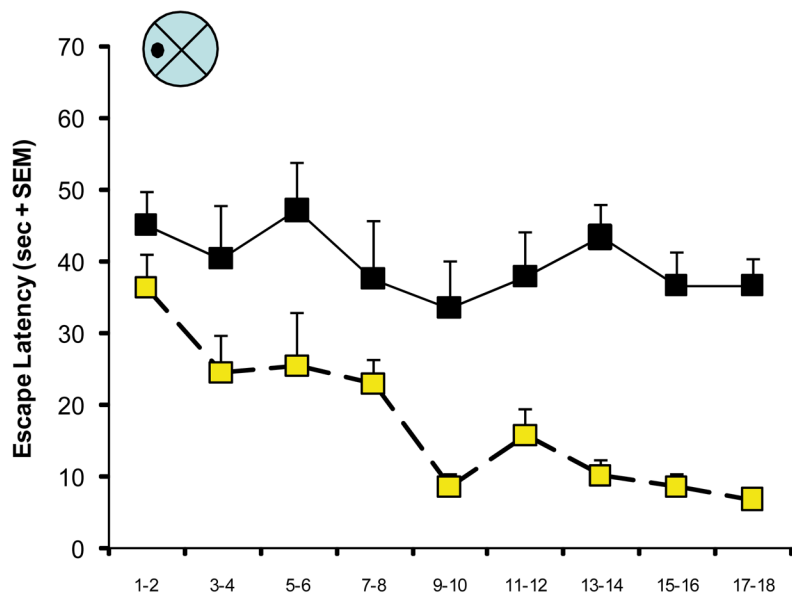

## Probe

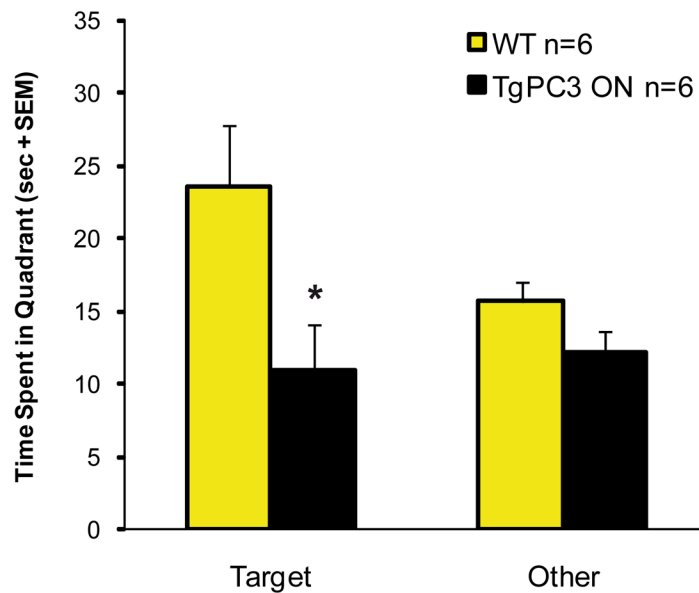

Supplement: pbio.0060246.sg007.pdf [file pbio.0060246.sg007.pdf]
